# Supplementary material for: Factors Associated With Cancer Disparities Among Low-, Medium-, and High-Income US Counties
Source: PubMed Central journal article supplement (PMC6324449; doi:10.1001/jamanetworkopen.2018.3146), 2018-10-05
Supplement: jamanetwopen-1-e183146-s001.pdf [file jamanetwopen-1-e183146-s001.pdf]

## Supplementary Online Content

O'Connor JM, Sedghi T, Dhodapkar M, Kane MJ, Gross CP. Factors Associated With Cancer Disparities Among Low-, Medium-, and High-Income US Counties. *JAMA Netw Open*. 2018;1(6):e183146. doi:10.1001/jamanetworkopen.2018.3146

eTable 1. Variables We Evaluated for Testing in Models of Mediation

eFigure 1. Calculating the Disparity Risk Index

eTable 2. Missing Values

eFigure 2. Geographic Distributions (Maps) of “Hot Spots” Using Spatial Autocorrelation Analysis of Data for the Exposure (Median Income), Outcome (Cancer Death Rate), and Possible Mediating Factors

eFigure 3. Fixed Effects vs Mixed Effects Models of the Possible Mediators

This supplementary material has been provided by the authors to give readers additional information about their work.

| <b>eTable 1.</b> Variables we evaluated for testing in models of mediation. |                                                                                                                                                                                              |                                                                                                                            |             |
|-----------------------------------------------------------------------------|----------------------------------------------------------------------------------------------------------------------------------------------------------------------------------------------|----------------------------------------------------------------------------------------------------------------------------|-------------|
| <b>Variable</b>                                                             | <b>Description</b>                                                                                                                                                                           | <b>Source</b>                                                                                                              | <b>Date</b> |
| <b>Primary Dependent Variable</b>                                           |                                                                                                                                                                                              |                                                                                                                            |             |
| <u>Cancer death rate</u>                                                    | Age-adjusted number of deaths per 100,000 persons per year at the county level due to any cancer including benign or malignant lesions.                                                      | Institute for Health Metrics and Evaluation (IHME). United States Cancer Mortality Rates by County 1980-2014. Seattle, WA. | 2014        |
| <b>Primary Independent Variable</b>                                         |                                                                                                                                                                                              |                                                                                                                            |             |
| <u>Median household income</u>                                              | Median level of income for a household in the county.                                                                                                                                        | Small Area Income and Poverty Estimates                                                                                    | 2012        |
| <b>Secondary Independent Variables</b>                                      |                                                                                                                                                                                              |                                                                                                                            |             |
| <u>Domain 1: Socioeconomic Factors</u>                                      |                                                                                                                                                                                              |                                                                                                                            |             |
| Poverty <sup>a</sup>                                                        | Percent of persons below the federal poverty level.                                                                                                                                          | American Community Survey                                                                                                  | 2011-2015   |
| HS Grad                                                                     | Percent of persons having graduated high school.                                                                                                                                             | National Center for Education Statistics                                                                                   | 2010-2011   |
| Some college                                                                | Percent of persons having some college education.                                                                                                                                            | American Community Survey                                                                                                  | 2008-2012   |
| Unemployment                                                                | Percent being unemployed.                                                                                                                                                                    | Bureau of Labor Statistics                                                                                                 | 2012        |
| Income inequality                                                           | Ratio of household income at the 80th percentile to that at the 20th percentile.                                                                                                             | American Community Survey                                                                                                  | 2009-2013   |
| Residential segregation                                                     | The index of dissimilarity, given as the percent of the black or white residents that would have to move to a new census tract in order for them to be distributed evenly across the county. | American Community Survey                                                                                                  | 2010-2014   |
| <u>Domain 2: Clinical Care Factors</u>                                      |                                                                                                                                                                                              |                                                                                                                            |             |
| Uninsured                                                                   | Percent of adults who do not have health insurance.                                                                                                                                          | Small Area Health Insurance Estimates                                                                                      | 2011        |

| <b>eTable 1 (cont'd).</b> Variables we evaluated for testing in models of mediation. |                                                                                                                                                                              |                                                                                                                                                                                                                                                        |           |
|--------------------------------------------------------------------------------------|------------------------------------------------------------------------------------------------------------------------------------------------------------------------------|--------------------------------------------------------------------------------------------------------------------------------------------------------------------------------------------------------------------------------------------------------|-----------|
| <u>Primary care physicians</u>                                                       | Number of primary care physicians per capita.                                                                                                                                | Area Health Resource File, including data from the American Medical Association, American Hospital Association, US Census Bureau, Centers for Medicare & Medicaid Services, Bureau of Labor Statistics, and the National Center for Health Statistics. | 2011      |
| Other primary care providers                                                         | Number of non-physician primary care providers per capita.                                                                                                                   | Centers for Medicare and Medicaid Services                                                                                                                                                                                                             | 2013      |
| <u>Low-quality care</u>                                                              | Proportion of all hospital discharges among Medicare fee-for-service beneficiaries that might be preventable because they are attributed to ambulatory-sensitive conditions. | Medicare Claims Data and the Dartmouth Atlas of Health Care.                                                                                                                                                                                           | 2011      |
| <u>Oncologists</u>                                                                   | Number of oncologists per capita.                                                                                                                                            | American Society of Clinical Oncology                                                                                                                                                                                                                  | 2014      |
| <u>Presence of a comprehensive cancer center</u>                                     | Presence (yes/no) of at least 1 comprehensive center in a county or adjacent county.                                                                                         | National Cancer Institute, Office of Cancer Centers.                                                                                                                                                                                                   | 2014      |
| <u>Mammography screening</u>                                                         | Percent screened among women aged 67-69 years in Medicare claims.                                                                                                            | Medicare Claims Data and the Dartmouth Atlas of Health Care.                                                                                                                                                                                           | 2011      |
| <u>Colorectal cancer screening</u> <sup>ab</sup>                                     | Percent of those aged 50 or greater receiving fecal occult blood testing or endoscopic screening.                                                                            | Behavioral Risk Factor Surveillance System (BRFSS) + National Health Interview Survey (NHIS)                                                                                                                                                           | 2008-2010 |
| <u>Cervical cancer screening</u> <sup>ab</sup>                                       | Percent of those aged 18 or greater without a hysterectomy receiving a Pap smear within 3 years.                                                                             | BRFSS + NHIS                                                                                                                                                                                                                                           | 2008-2010 |
| <u>Health care costs</u>                                                             | Price-adjusted per-enrollee reimbursement among beneficiaries of Medicare Part A and Part B.                                                                                 | Dartmouth Atlas of Health Care                                                                                                                                                                                                                         | 2011      |
| <u>Unaffordable care</u>                                                             | Percent being unable to see a doctor because of costs.                                                                                                                       | BRFSS                                                                                                                                                                                                                                                  | 2006-2012 |

| <b>eTable 1 (cont'd).</b> Variables we evaluated for testing in models of mediation. |                                                                                                       |                                                                                                                                       |           |
|--------------------------------------------------------------------------------------|-------------------------------------------------------------------------------------------------------|---------------------------------------------------------------------------------------------------------------------------------------|-----------|
| <u>Domain 3: Health Behaviors</u>                                                    |                                                                                                       |                                                                                                                                       |           |
| <u>Smoking (adult)</u>                                                               | Percent of adults who were current smokers.                                                           | National Institute of Health, with pooled data from multiple sources including BRFSS                                                  | 2008-2010 |
| <u>Obesity (adult)</u>                                                               | Percent of adults reporting a body mass index higher than 30 kg/m <sup>2</sup> .                      | BRFSS                                                                                                                                 | 2010      |
| <u>Physical inactivity (adult)</u>                                                   | Percent of adults reporting no leisure-time physical activity.                                        | BRFSS                                                                                                                                 | 2010      |
| <u>Sexually transmitted infections</u>                                               | Number of new cases of chlamydia per capita.                                                          | National Center for HIV/AIDS, Viral Hepatitis, STD, and TB prevention                                                                 | 2011      |
| <u>HIV prevalence</u>                                                                | Number of diagnosed cases of HIV for persons aged 13 years and older in a county per 100,000 persons. | National Center for HIV/AIDS, Viral Hepatitis, STD, and TB prevention                                                                 | 2010      |
| <u>Domain 4: Physical and Health Environment Factors</u>                             |                                                                                                       |                                                                                                                                       |           |
| <u>Air pollution</u>                                                                 | Average daily density of fine particulate matter.                                                     | Centers for Disease Control and Prevention Wide-ranging Online Data for Epidemiologic Research                                        | 2011      |
| Drinking water violations                                                            | Number of reported violations per capita.                                                             | US Environmental Protection Agency Safe Drinking Water Information System                                                             | 2012-2013 |
| Limited access to healthy foods                                                      | Percent of low income persons who report they do not live near a grocery store.                       | US Department of Agriculture (USDA) Food Environment Atlas                                                                            | 2010      |
| <u>Food insecurity</u>                                                               | Percent who report they did not have a reliable source of food in the past year.                      | Map the Meal Gap, Community Population Survey, Bureau of Labor Statistics, and American Community Survey                              | 2011      |
| Food environment index                                                               | An equally-weighted sum of the measures of food insecurity and limited access to healthy foods.       | USDA Food Environment Atlas, Map the Meal Gap, Community Population Survey, Bureau of Labor Statistics, and American Community Survey | 2010-2011 |

| <b>eTable 1 (cont'd).</b> Variables we evaluated for testing in models of mediation. |                                                                                                                                        |                                                                                                                      |            |
|--------------------------------------------------------------------------------------|----------------------------------------------------------------------------------------------------------------------------------------|----------------------------------------------------------------------------------------------------------------------|------------|
| <u>Access to exercise opportunities</u>                                              | Percent who report living reasonably close to a location for physical activity such as a park.                                         | OneSource Global Business Browser, Delorme map data, Esri, and US Tigerline Files                                    | 2010; 2012 |
| Severe housing problems                                                              | Percent who report living in housing that is overcrowded or severely cost burdened or without complete kitchen or plumbing facilities. | US Department of Housing and Urban Development Comprehensive Housing Affordability Strategy data                     | 2006-2010  |
| <u>Domain 5: Health Policies</u>                                                     |                                                                                                                                        |                                                                                                                      |            |
| <u>Smoke-free laws</u>                                                               | Percent who report living in an area with any type of smoke-free law.                                                                  | American Lung Association, on the basis of data from the Current Population Survey Tobacco Use Supplements (TUS-CPS) | 2010-2011  |
| <u>Medicaid-to-Medicare fee index</u>                                                | The state-level ratio of payments to providers for services to beneficiaries of Medicaid vs Medicare.                                  | Kaiser Family Foundation, on the basis of data from the Urban Institute                                              | 2012       |
| <u>Medicaid eligibility threshold</u>                                                | The state-level threshold for Medicaid eligibility among working parents of dependent children as a percent of the poverty level.      | Kaiser Family Foundation                                                                                             | 2013       |
| <u>State cancer mandates for health insurance payments</u>                           | Number of state-level mandates for insurers to reimburse for cancer prevention, screening, diagnosis, or treatment.                    | National Conference of State Legislatures                                                                            | 2009       |
| <u>State cancer exceptions for health insurance payment mandates</u>                 | Presence of state-level exceptions to the mandates to reimburse for cancer prevention, screening, diagnosis, or treatment.             | National Conference of State Legislatures                                                                            | 2009       |

| <b>eTable 1 (cont'd). Variables we evaluated for testing in models of mediation.</b>                                                                                                                                                                                                                                                                                                                                                                                                                                                                                                                                                |                                                                                              |                                     |           |
|-------------------------------------------------------------------------------------------------------------------------------------------------------------------------------------------------------------------------------------------------------------------------------------------------------------------------------------------------------------------------------------------------------------------------------------------------------------------------------------------------------------------------------------------------------------------------------------------------------------------------------------|----------------------------------------------------------------------------------------------|-------------------------------------|-----------|
| <b>Demographic Variables</b>                                                                                                                                                                                                                                                                                                                                                                                                                                                                                                                                                                                                        |                                                                                              |                                     |           |
| <u>Race/ethnicity</u>                                                                                                                                                                                                                                                                                                                                                                                                                                                                                                                                                                                                               | Percent of residents who are Non-Hispanic Black, Hispanic, Asian, Native American or Alaskan | US Census Population Estimates      | 2012      |
| <u>Sex</u>                                                                                                                                                                                                                                                                                                                                                                                                                                                                                                                                                                                                                          | Percent who are female.                                                                      | US Census Population Estimates      | 2012      |
| <u>Rurality</u>                                                                                                                                                                                                                                                                                                                                                                                                                                                                                                                                                                                                                     | Percent who are living in a mostly rural area.                                               | US Census Population Estimates      | 2010      |
| <u>Primary language</u>                                                                                                                                                                                                                                                                                                                                                                                                                                                                                                                                                                                                             | Percent who are Non-English proficient.                                                      | American Community Survey Estimates | 2008-2012 |
| <p><i>Italics</i> = Variables that we extracted from sources other than the Robert Wood Johnson County Health Rankings.</p> <p><sup>a</sup> Variables that we extracted from the State Cancer Profiles database.</p> <p><sup>b</sup> Variables that we extracted from modeled estimates rather than direct estimates.</p> <p><u>Underline</u> = Variables that were evaluated for inclusion or included in the final multiple mediator model (n=19 possible mediator variables; n=4 demographic variables; n=1 primary independent variable [median household income]; and n=1 primary dependent variable [cancer death rate]).</p> |                                                                                              |                                     |           |

**eFigure 1.** Calculating the disparity risk index.

$$\text{Disparity Risk Index} = \sum_{i=1}^8 \omega_i Z_i ,$$

$$\text{where } Z_i = \frac{x_i - \mu_i}{\sigma_i} ,$$

$\omega$  = the mediator's weight, given by its standardized beta coefficient  
from the multiple mediator model,

$x$  = the mediator's value,

$\mu$  = the mediator's mean,

and  $\sigma$  = the mediator's standard deviation.

| <b>eTable 2. Missing Values</b>                                                                                                                                                                                |                              |
|----------------------------------------------------------------------------------------------------------------------------------------------------------------------------------------------------------------|------------------------------|
| <b>Variable</b>                                                                                                                                                                                                | <b>Missing Values, n (%)</b> |
| Cancer death rate                                                                                                                                                                                              | 0 (0)                        |
| Median household income                                                                                                                                                                                        | 0 (0)                        |
| Physical inactivity                                                                                                                                                                                            | 0 (0)                        |
| Obesity                                                                                                                                                                                                        | 0 (0)                        |
| Poverty                                                                                                                                                                                                        | 0 (0)                        |
| HS Grad                                                                                                                                                                                                        | 449 (14)                     |
| Some college                                                                                                                                                                                                   | 0 (0)                        |
| Smoking                                                                                                                                                                                                        | 3 (<1)                       |
| Food insecurity                                                                                                                                                                                                | 0 (0)                        |
| Unemployment                                                                                                                                                                                                   | 1 (<1)                       |
| Income inequality                                                                                                                                                                                              | 0 (0)                        |
| Severe housing problems                                                                                                                                                                                        | 0 (0)                        |
| Uninsured                                                                                                                                                                                                      | 1 (<1)                       |
| State cancer mandates for health insurance payments                                                                                                                                                            | 0 (0)                        |
| State cancer exceptions for health insurance payment mandates                                                                                                                                                  | 0 (0)                        |
| Food environment index                                                                                                                                                                                         | 0 (0)                        |
| Colorectal cancer screening                                                                                                                                                                                    | 26 (1)                       |
| Limited access to healthy foods                                                                                                                                                                                | 0 (0)                        |
| Mammography screening                                                                                                                                                                                          | 85 (3)                       |
| Smoke-free laws                                                                                                                                                                                                | 0 (0)                        |
| Access to exercise opportunities                                                                                                                                                                               | 24 (1)                       |
| Primary care physicians                                                                                                                                                                                        | 137 (4)                      |
| Other primary care providers                                                                                                                                                                                   | 123 (4)                      |
| Medicaid eligibility threshold                                                                                                                                                                                 | 0 (0)                        |
| Medicaid-to-Medicare fee index                                                                                                                                                                                 | 95 (3)                       |
| Air pollution                                                                                                                                                                                                  | 29 (1)                       |
| Drinking water violations                                                                                                                                                                                      | 55 (2)                       |
| Uninsured                                                                                                                                                                                                      | 1 (<1)                       |
| Cervical cancer screening                                                                                                                                                                                      | 26 (1)                       |
| Presence of a comprehensive cancer center                                                                                                                                                                      | 0 (0)                        |
| Oncologists                                                                                                                                                                                                    | 0 (0)                        |
| Low-quality care                                                                                                                                                                                               | 190 (6)                      |
| Unaffordable care                                                                                                                                                                                              | 754 (24)                     |
| Sexually transmitted infections                                                                                                                                                                                | 184 (6)                      |
| HIV prevalence                                                                                                                                                                                                 | 816 (26)                     |
| Residential segregation                                                                                                                                                                                        | 359 (11)                     |
| Rurality                                                                                                                                                                                                       | 0 (0)                        |
| Race/ethnicity: % Black                                                                                                                                                                                        | 0 (0)                        |
| Race/ethnicity: % Native American or Alaskan                                                                                                                                                                   | 0 (0)                        |
| Race/ethnicity: % Asian                                                                                                                                                                                        | 0 (0)                        |
| Race/ethnicity: % Hispanic                                                                                                                                                                                     | 0 (0)                        |
| Sex                                                                                                                                                                                                            | 0 (0)                        |
| Primary language                                                                                                                                                                                               | 0 (0)                        |
| <i>We used multiple imputation for variables with &gt;5% and &lt;20% missing values. We excluded variables with &gt;20% missing values. We did not impute values for variables with &lt;5% missing values.</i> |                              |



**eFigure 2.** Geographic distributions (maps) of “hot spots” using spatial autocorrelation analysis of data for the exposure (median income), outcome (cancer death rate), and possible mediating factors.

Getis-Ord Spatial Autocorrelations (Hot Spots): Cancer Death Rates

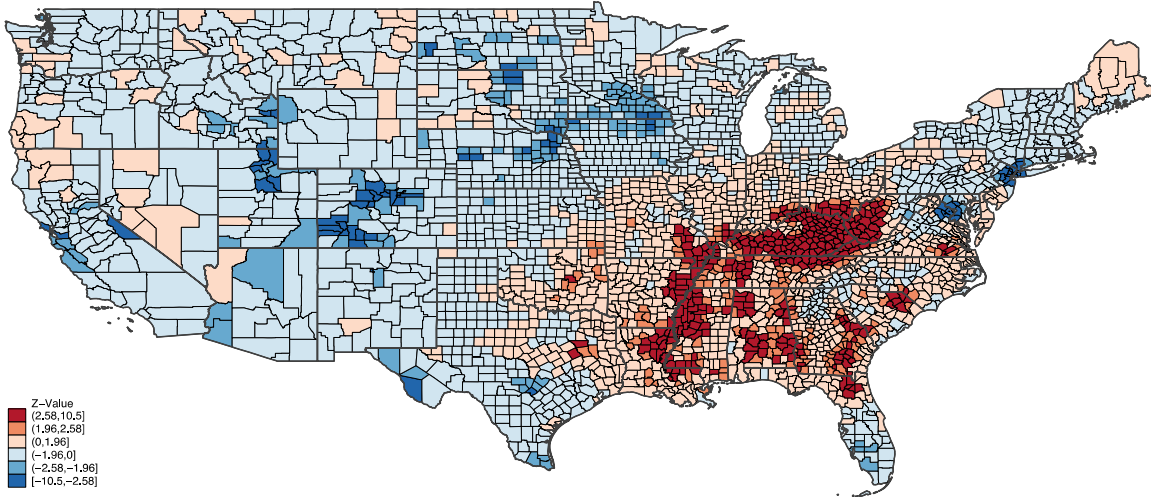

| Getis-Ord $G^*i(d)$ Statistics |                | Number of Obs = 3135   |                    |                      |               |  |
|--------------------------------|----------------|------------------------|--------------------|----------------------|---------------|--|
| Variable                       | $z \leq -2.58$ | $-2.58 < z \leq -1.96$ | $-1.96 < z < 1.96$ | $1.96 \leq z < 2.58$ | $2.58 \leq z$ |  |
| Cancer Death Rate              | 89             | 134                    | 2405               | 179                  | 328           |  |

Getis-Ord Spatial Autocorrelations (Hot Spots): Median Household Income

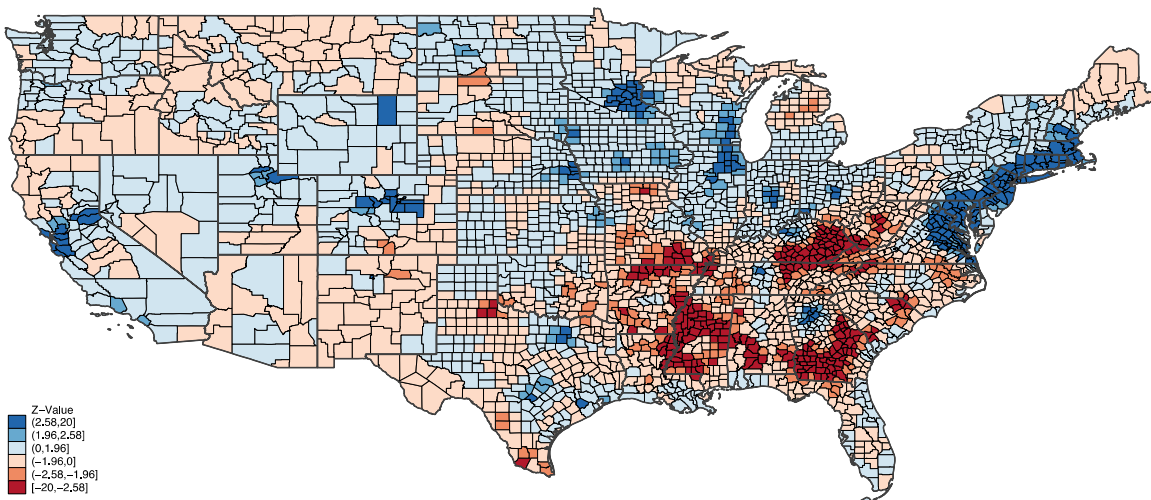

| Getis-Ord $G^*i(d)$ Statistics |                | Number of Obs = 3135   |                    |                      |               |  |
|--------------------------------|----------------|------------------------|--------------------|----------------------|---------------|--|
| Variable                       | $z \leq -2.58$ | $-2.58 < z \leq -1.96$ | $-1.96 < z < 1.96$ | $1.96 \leq z < 2.58$ | $2.58 \leq z$ |  |
| Median Income                  | 244            | 210                    | 2341               | 128                  | 212           |  |

Getis-Ord Spatial Autocorrelations (Hot Spots): Smoking

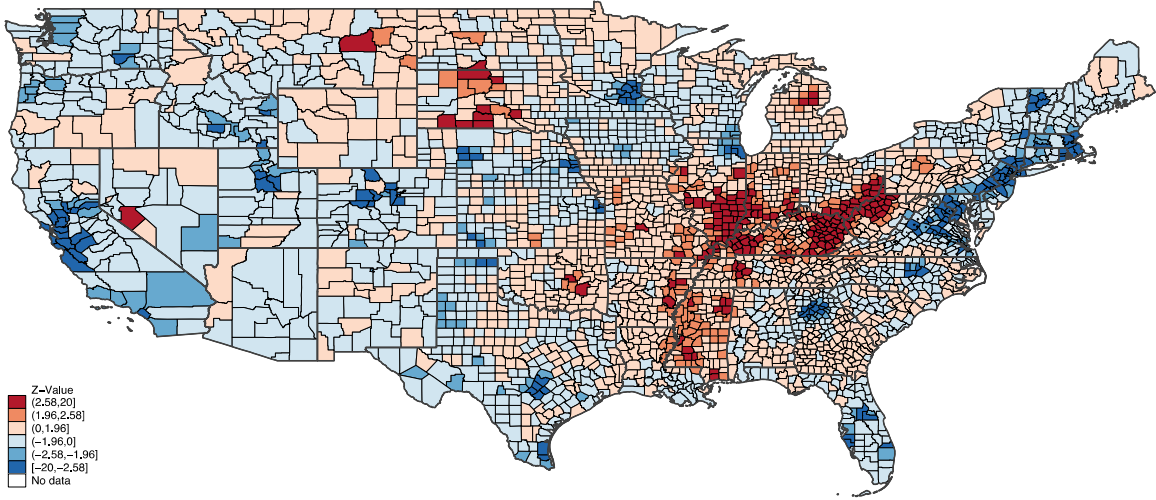

Getis-Ord  $G^*i(d)$  Statistics

Number of Obs = 3135

| Variable | $z \leq -2.58$ | $-2.58 < z \leq -1.96$ | $-1.96 < z < 1.96$ | $1.96 \leq z < 2.58$ | $2.58 \leq z$ |
|----------|----------------|------------------------|--------------------|----------------------|---------------|
| Smoking  | 171            | 136                    | 2434               | 197                  | 194           |

Getis-Ord Spatial Autocorrelations (Hot Spots): Obesity

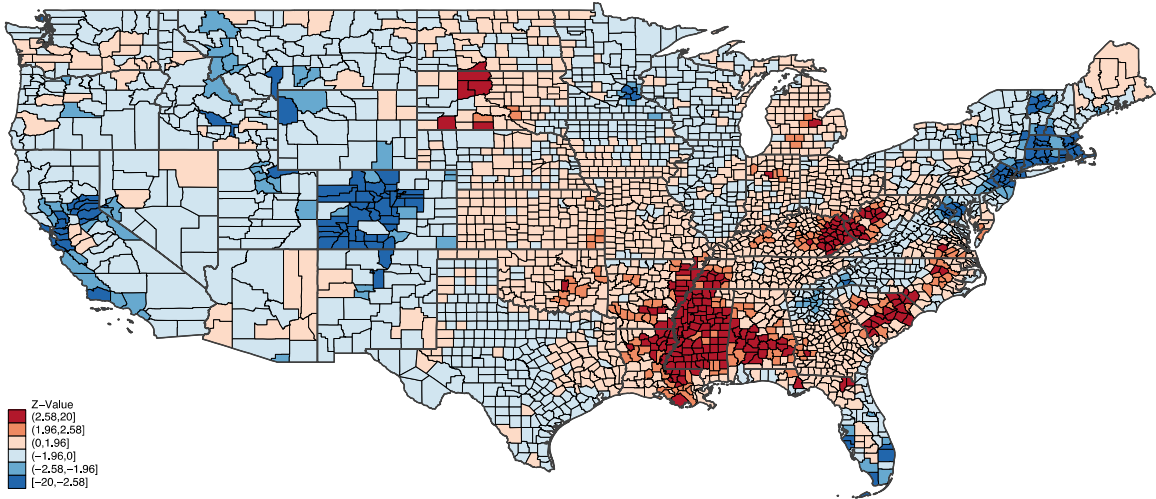

Getis-Ord  $G^*i(d)$  Statistics

Number of Obs = 3135

| Variable | $z \leq -2.58$ | $-2.58 < z \leq -1.96$ | $-1.96 < z < 1.96$ | $1.96 \leq z < 2.58$ | $2.58 \leq z$ |
|----------|----------------|------------------------|--------------------|----------------------|---------------|
| Obesity  | 143            | 94                     | 2537               | 162                  | 199           |

Getis-Ord Spatial Autocorrelations (Hot Spots): Physical Inactivity

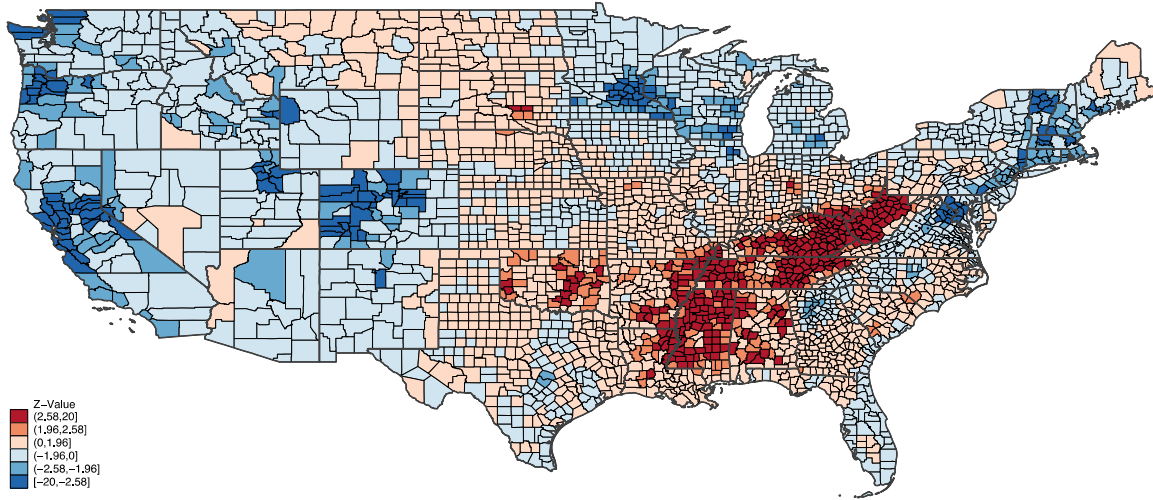

Getis-Ord  $G^*i(d)$  Statistics

Number of Obs = 3135

| Variable   | $z \leq -2.58$ | $-2.58 < z \leq -1.96$ | $-1.96 < z < 1.96$ | $1.96 \leq z < 2.58$ | $2.58 \leq z$ |
|------------|----------------|------------------------|--------------------|----------------------|---------------|
| Inactivity | 147            | 172                    | 2347               | 169                  | 300           |

Getis-Ord Spatial Autocorrelations (Hot Spots): Food Insecurity

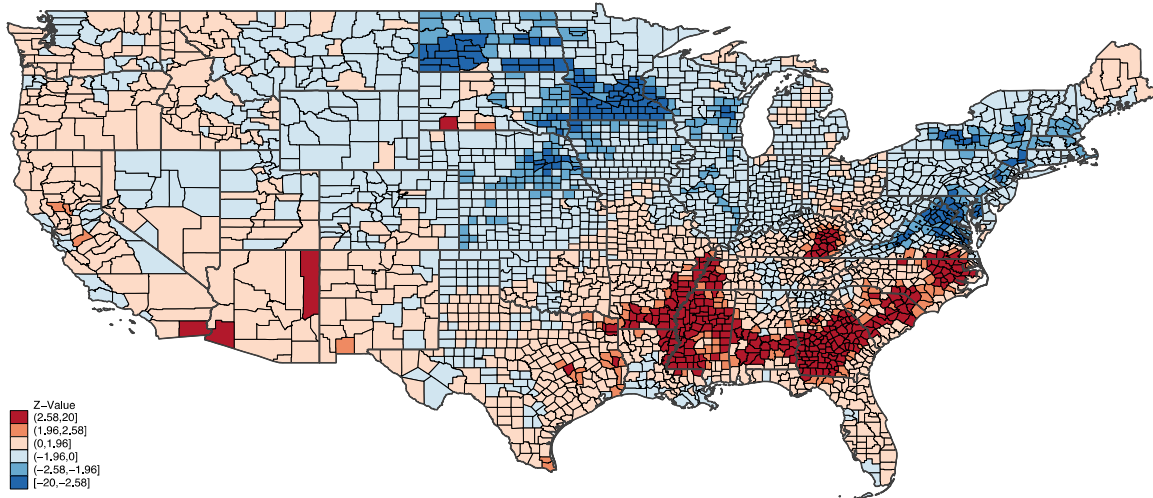

Getis-Ord  $G^*i(d)$  Statistics

Number of Obs = 3135

| Variable        | $z \leq -2.58$ | $-2.58 < z \leq -1.96$ | $-1.96 < z < 1.96$ | $1.96 \leq z < 2.58$ | $2.58 \leq z$ |
|-----------------|----------------|------------------------|--------------------|----------------------|---------------|
| Food Insecurity | 157            | 230                    | 2357               | 107                  | 284           |

Getis-Ord Spatial Autocorrelations (Hot Spots): Medicaid Fee Index

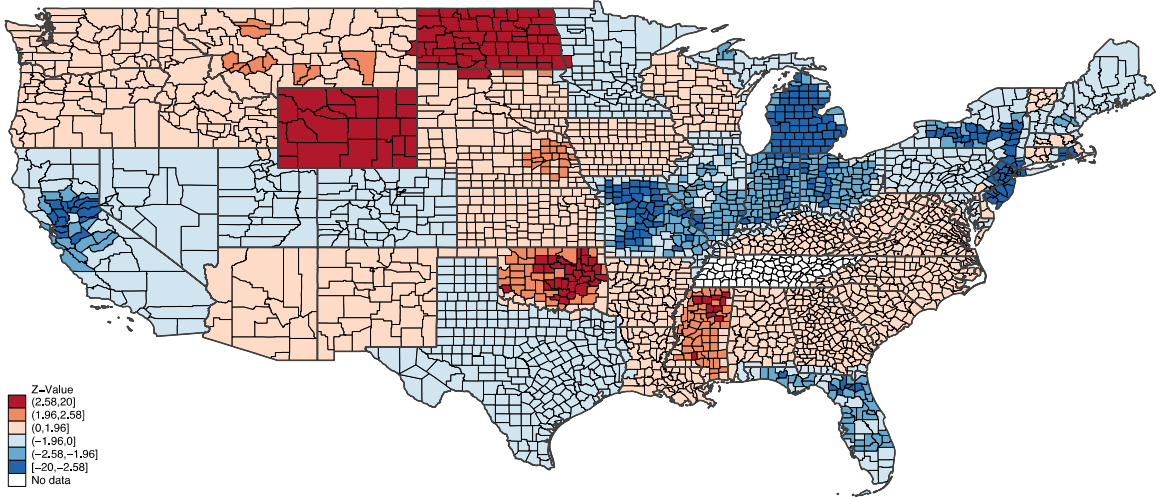

Getis-Ord  $G^*i(d)$  Statistics Number of Obs = 3135

---

| Variable     | $z \leq -2.58$ | $-2.58 < z \leq -1.96$ | $-1.96 < z < 1.96$ | $1.96 \leq z < 2.58$ | $2.58 \leq z$ |
|--------------|----------------|------------------------|--------------------|----------------------|---------------|
| M. Fee Index | 213            | 276                    | 2296               | 112                  | 143           |

---

Getis-Ord Spatial Autocorrelations (Hot Spots): Smokefree Laws

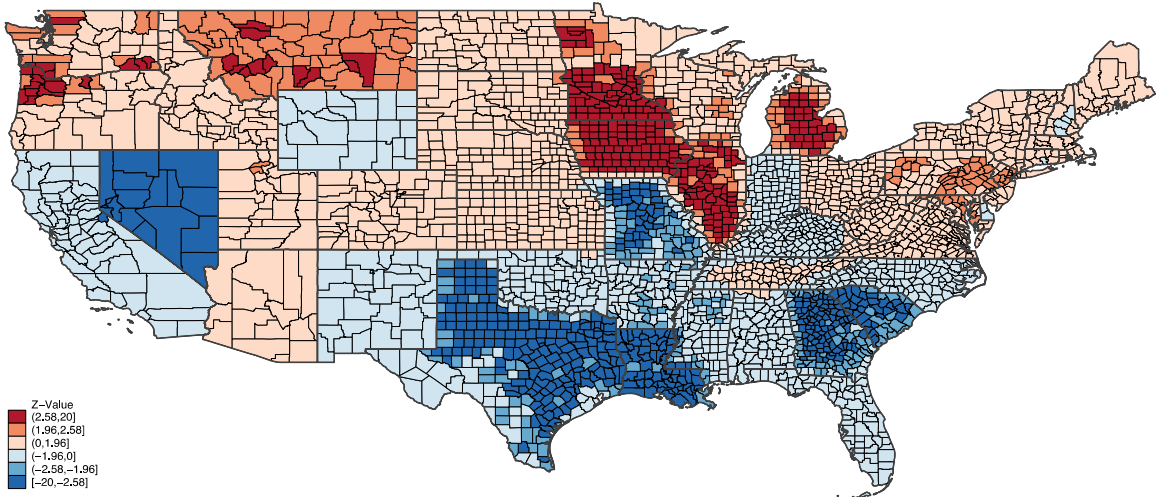

Getis-Ord  $G^*i(d)$  Statistics Number of Obs = 3135

---

| Variable  | $z \leq -2.58$ | $-2.58 < z \leq -1.96$ | $-1.96 < z < 1.96$ | $1.96 \leq z < 2.58$ | $2.58 \leq z$ |
|-----------|----------------|------------------------|--------------------|----------------------|---------------|
| Smokefree | 421            | 187                    | 2059               | 201                  | 267           |

---



Getis-Ord Spatial Autocorrelations (Hot Spots): Unaffordable Care

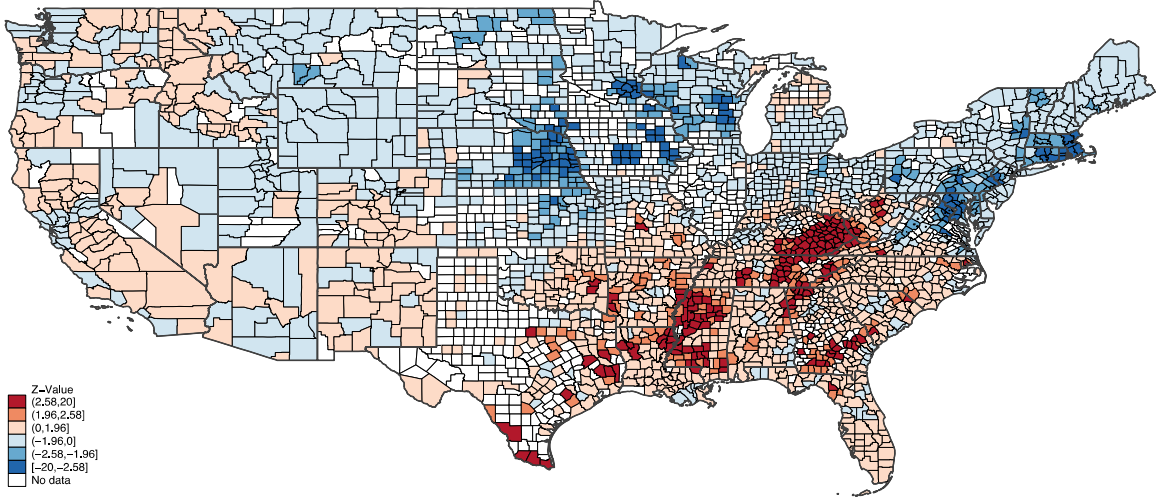

Getis-Ord  $G^*i(d)$  Statistics Number of Obs = 3135

---

| Variable       | $z \leq -2.58$ | $-2.58 < z \leq -1.96$ | $-1.96 < z < 1.96$ | $1.96 \leq z < 2.58$ | $2.58 \leq z$ |
|----------------|----------------|------------------------|--------------------|----------------------|---------------|
| Unafford. Care | 108            | 161                    | 1797               | 136                  | 179           |

---

Getis-Ord Spatial Autocorrelations (Hot Spots): Low-Quality Care

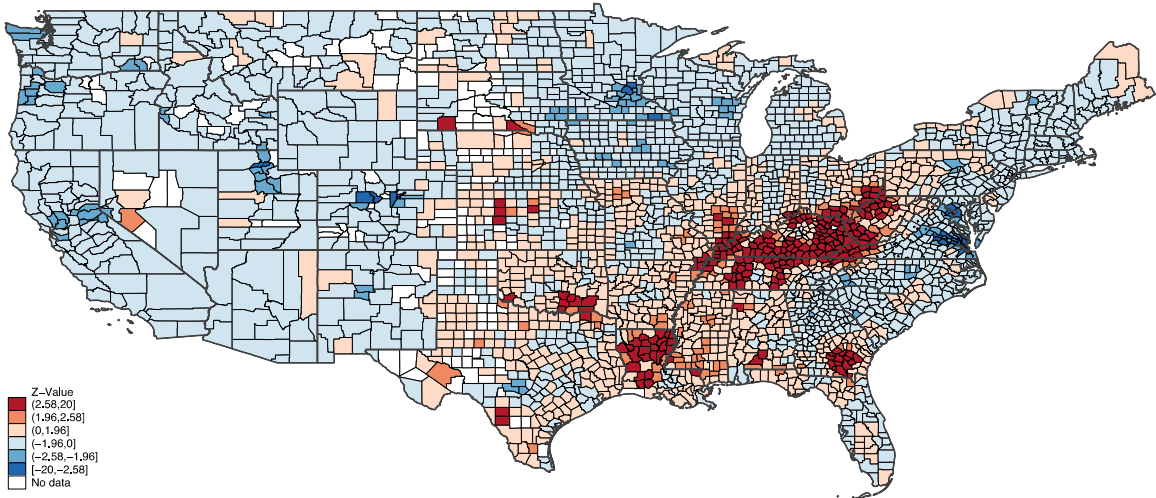

Getis-Ord  $G^*i(d)$  Statistics Number of Obs = 3135

---

| Variable       | $z \leq -2.58$ | $-2.58 < z \leq -1.96$ | $-1.96 < z < 1.96$ | $1.96 \leq z < 2.58$ | $2.58 \leq z$ |
|----------------|----------------|------------------------|--------------------|----------------------|---------------|
| Low-Qual. Care | 37             | 109                    | 2441               | 116                  | 242           |

---

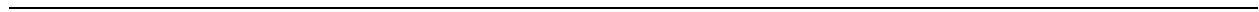



3. Fixed effects, minus 2 state-level variables

Multiple-imputation estimates                                Imputations                                =                                20  
 Linear regression                                                                                        Number of obs                                =                                3,132

| mortrate    | Coef.     | Std. Err. | t      | P> t  | [95% Conf. Interval]  |
|-------------|-----------|-----------|--------|-------|-----------------------|
| mhihog      | -10.10566 | 2.889607  | -3.50  | 0.000 | -15.7715   -4.439808  |
| costsnodoc  | 39.28835  | 8.882969  | 4.42   | 0.000 | 21.82854   56.74816   |
| smoking     | .8252575  | .0896176  | 9.21   | 0.000 | .6495308   1.000984   |
| obesity     | 139.8433  | 13.0498   | 10.72  | 0.000 | 114.2559   165.4307   |
| inactivity  | 94.68399  | 11.38303  | 8.32   | 0.000 | 72.36328   117.0047   |
| foodinsec   | 143.4216  | 17.81976  | 8.05   | 0.000 | 108.4779   178.3653   |
| preventhosp | .2317567  | .0160857  | 14.41  | 0.000 | .2001787   .2633348   |
| rural       | -18.00525 | 1.496834  | -12.03 | 0.000 | -20.9402   -15.0703   |
| rblack      | 3.687628  | 3.941858  | 0.94   | 0.350 | -4.041385   11.41664  |
| rnatam      | -21.65207 | 5.309147  | -4.08  | 0.000 | -32.06639   -11.23775 |
| rasian      | -39.26699 | 19.84936  | -1.98  | 0.048 | -78.18688   -.3471043 |
| rpacisle    | 177.659   | 103.2778  | 1.72   | 0.085 | -24.84137   380.1593  |
| rhispc      | -40.70658 | 5.015467  | -8.12  | 0.000 | -50.54072   -30.87243 |
| female      | 49.43357  | 16.80095  | 2.94   | 0.003 | 16.49092   82.37622   |
| noenglish   | -70.11869 | 22.81019  | -3.07  | 0.002 | -114.8446   -25.39277 |
| _cons       | 170.5315  | 35.03096  | 4.87   | 0.000 | 101.8438   239.2192   |
